# Supplementary material for: A reagentless electrochemical biosensor based on a protein scaffoldElectronic supplementary information (ESI) available: details regarding protein engineering and purification. See http://www.rsc.org/suppdata/cc/b2/b209452e/
Source: Royal Society of Chemistry journal article supplement (doi:10.1039/b209452e), 2003-01-02
Supplement: b209452e.doc [file b209452e.doc]

**Supplemental information**

A plasmid encoding wild type sperm whale myoglobin (Mb)1 (kindly provided by the laboratory of Dr. John S. Olson of Rice University) was used as the starting point for apo-HTC64Mb. PCR cloning was conducted to yield a Mb coding sequence for expression of an easily purified protein with an appended C-terminal hexa-histidine affinity segment. A truncated version of the Mb gene in this construct was prepared by digestion with restriction endonucleases AatII/XhoI followed by ligation of a phosphorylated stuffer fragment into these sites of the digested plasmid. The resulting plasmid having the truncated Mb sequence (pET22MbST) was restricted with AatII/XhoI and the gene fragment removed from a plasmid encoding C64 Mb (Olson Lab) using the identical enzymes was subsequently ligated into the pET-22 vector and transformed into E. coli DH5a. PCR analysis of plasmids from individual clones confirmed the insertion of the C64 gene (pET22C64Mb). E. coli Bl21(DE3) freshly transformed with pET22-C64Mb were grown and harvested for the extraction and purification of apo-HTC64Mb using a nickel-NTA agarose column under denaturing conditions

Cell culture and HTC64Mb expression

*E. coli* Bl21(DE3) freshly transformed with pET22-C64Mb were grown at 37C in 1 liter cultures (Luria broth/100 g/ml carbenicillin) to an OD600 of 0.9. Culture flasks were then shaken at 27C for 15 min, followed by addition of IPTG to a final concentration of 1.0 mM. The cells were harvested after 2 hr induction at 27C by centrifugation (4C) and cell pellets were quick-frozen in powdered dry ice for storage at -80C prior to extraction and purification of apo-HTC64Mb.

Purification of apo-HTC64Mb

The frozen (-80C) cell pellet from 1 liter of cell culture was thawed/suspended with 25 ml cold buffer A (100 mM NaH2PO4, 10 mM Tris, 6 M guanidineHCl, 5 mM imidazole, 10 mM 2-mercaptoethanol, pH 8.0), and stirred at room temperature for 30 min. The viscous lysate was then sonicated briefly at room temperature to shear DNA and ensure complete dissolution of cellular proteins. The lysate was centrifuged at 4C for 25 min at 500 rpm, and the resulting supernate was tumbled at room temperature for 50 min with NiNTA resin (Qiagen) that had previously been equilibrated with Buffer A (7 ml settled resin). The resin was then sedimented by centrifugation for 5 min at 4C at 500 rpm. The supernate was discarded and the resin washed by resupension with 20 ml Buffer A followed by brief centrifugal sedimentation of charged resin. The resin was transferred to a 1.5 cm diameter glass column and washed with 25 ml Buffer A at 0.85 ml/min. The resin was then washed with 30 ml Buffer B (100 mM NaH2PO4, 10 mM Tris, 8 M urea, 5 mM imidazole, 10 mM 2-mercaptoethanol, adjusted to pH 8.0 immediately prior to use), followed by 40 ml of Buffer C1 (200 mM sodium acetate, 8 M urea, 10 mM 2-mercaptoethanol, pH 6.5). The column containing the washed resin was cooled to 4C before proceeding with the remainder of the purification. 40 ml of chilled Buffer C2 (50 mM sodium acetate, 300 mM NaCl, pH 6.5) was then passed over the column to allow renaturation of the apo-protein, followed by elution with Buffer E (50mM NaH2PO4, 300 mM NaCl, 250 mM imidazole, pH 6.5). 1 ml fractions were collected during elution and the fractions subsequently analyzed by UV/visible spectroscopy for protein content. Pooled samples containing approximately 8 mg protein (280 = 15,200 M-1 cm-1) were dialyzed twice at 4C against 1.3 liters of 0.1 M potassium phosphate, 1 mM EDTA, pH 7.3), and followed by brief centrifugation to remove a small amount of precipitated material prior to storage at 4C. The purified apo-protein contained no detectable heme as judged by UV/visible spectrophotometry.

1 B. A. Springer and S. G. Sligar, Proc. Natl. Acad. Sci. U. S. A., 1987, 84, 8961.
